# Supplementary material
Source: HighWire-hosted journal article supplement (https://erj.ersjournals.com/content/56/4/2002885)
Supplement: inline-supplementary-material-1 [file inline-supplementary-material-1.pdf]

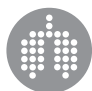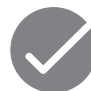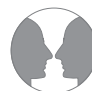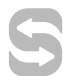

SHAREABLE PDF

# Healthcare workers with COVID-19 in Mexico

Silvio A. Ñamendys-Silva <sup>1,2</sup>

**Affiliations:** <sup>1</sup>Instituto Nacional de Ciencias Medicas y Nutricion Salvador Zubiran, Mexico City, Mexico. <sup>2</sup>Instituto Nacional de Cancerología, Mexico City, Mexico.

**Correspondence:** Silvio A. Ñamendys-Silva, Instituto Nacional de Ciencias Medicas y Nutricion Salvador Zubiran, 14080, Mexico City, Mexico. E-mail: [snamendys@gmail.com](mailto:snamendys@gmail.com)

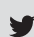

@ERSpublications

**Healthcare workers can be infected in the community, and in interactions with colleagues; therefore, such infections are not always the result of acquisition from infected patients** <https://bit.ly/30opbTk>

**Cite this article as:** Ñamendys-Silva SA,

1Instituto Nacional de Ciencias Medicas y Nutricion Salvador Zubiran, Mexico City, Mexico. 2Instituto Nacional de Cancerología, Mexico City, Mexico.. Healthcare workers with COVID-19 in Mexico. *Eur Respir J* 2020; 56: 2002885 [<https://doi.org/10.1183/13993003.02885-2020>].

This single-page version can be shared freely online.

## *To the Editor:*

I read with interest the recently published report by SIDDQUI *et al.* [1], which described the characteristics and outcomes of health and social care workers testing positive for severe acute respiratory syndrome coronavirus 2 (SARS-CoV-2) in the Tayside region of Scotland.
